# Supplementary material for: Posttranscriptional Regulation of the Yersinia pestis Cyclic AMP Receptor Protein Crp and Impact on Virulence
Source: PubMed Central journal article supplement — mBio. 2014 Feb 11;5(1):e01038-13. doi: 10.1128/mBio.01038-13 (PMC3950509; doi:10.1128/mbio.01038-13), 2014-02-11
Supplement: mbo001141735sf01.pdf [file mbo001141735sf01.pdf]

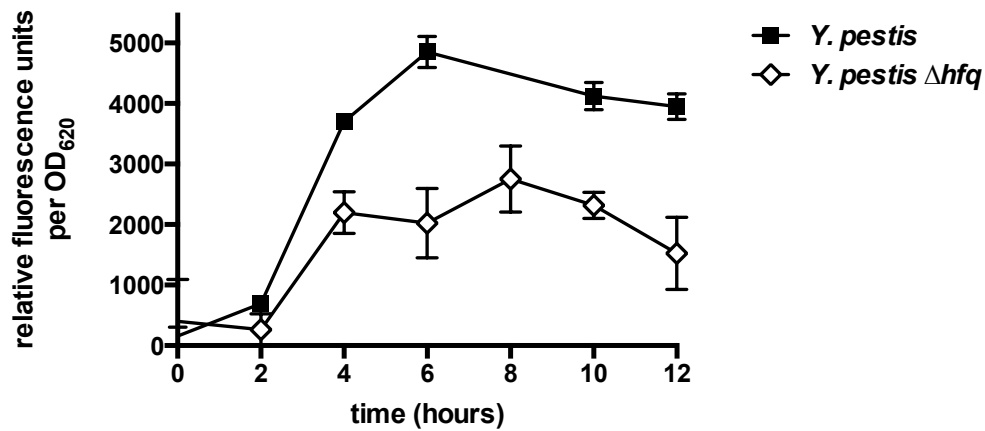

**FIG S1** Kinetics of  $P_{tetO-crp}$  5' UTR-*gfp* induction during the growth of *Y. pestis*. Wild-type or  $\Delta hfq$  *Y. pestis* strains with the chromosomal-integrated  $P_{tetO-crp}$  5' UTR-*gfp* reporter construct were cultured at 37°C in the presence of ATc and every 2 hours, relative fluorescence normalized to the optical density of the culture was determined. Data are representative of at least 3 independent experiments.
