# Supplementary material for: Posttranscriptional Regulation of the Yersinia pestis Cyclic AMP Receptor Protein Crp and Impact on Virulence
Source: PubMed Central journal article supplement — mBio. 2014 Feb 11;5(1):e01038-13. doi: 10.1128/mBio.01038-13 (PMC3950509; doi:10.1128/mbio.01038-13), 2014-02-11
Supplement: mbo001141735sf02.pdf [file mbo001141735sf02.pdf]

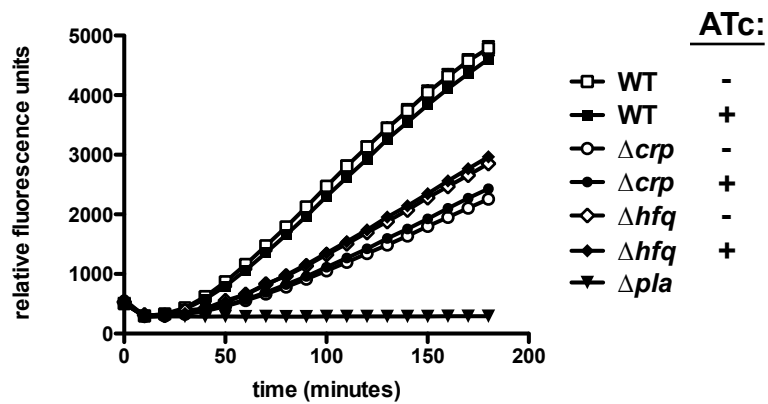

**FIG S2** ATc has no impact on plasminogen activation, a measure of Pla activity. Wild-type,  $\Delta hfq$ , or  $\Delta crp$  *Y. pestis* bacteria were cultured in the presence of ATc or vehicle and plg activation was measured as described for Fig. 2C. The  $\Delta pla$  strain of *Y. pestis* is shown as a control for Pla activity.
