# Supplementary material for: Posttranscriptional Regulation of the Yersinia pestis Cyclic AMP Receptor Protein Crp and Impact on Virulence
Source: PubMed Central journal article supplement — mBio. 2014 Feb 11;5(1):e01038-13. doi: 10.1128/mBio.01038-13 (PMC3950509; doi:10.1128/mbio.01038-13), 2014-02-11
Supplement: mbo001141735sf03.pdf [file mbo001141735sf03.pdf]

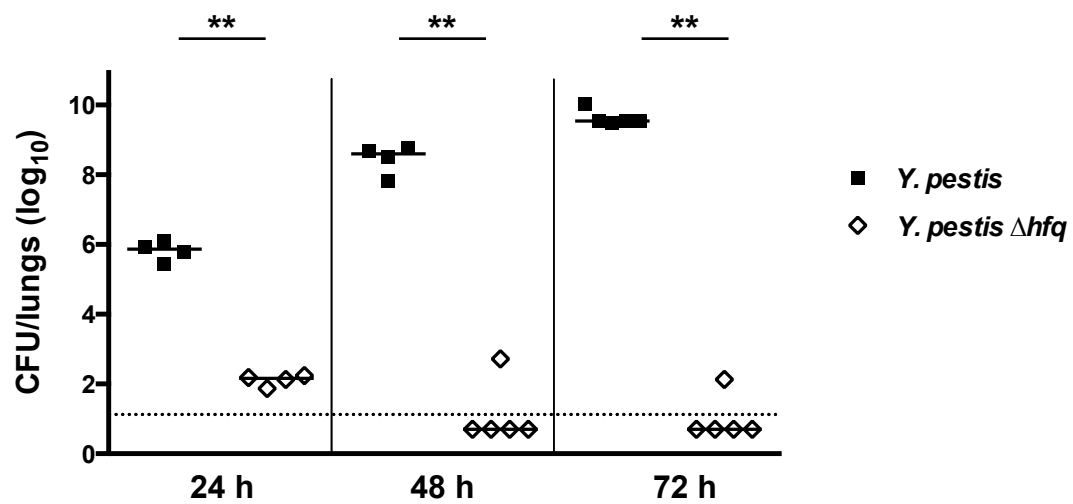

**FIG S3** Kinetics of *Y. pestis* Δ*hfq* during lung infection. Mice were infected i.n. with either *Y. pestis* or *Y. pestis* Δ*hfq* and at the indicated times, CFUs in the lungs were enumerated. Each point represents the numbers recovered from a single mouse. The limit of detection is indicated by a dashed line. Symbols below the limit of detection represent mice that did not have detectable numbers of bacteria. A solid line indicates the median of CFU recovered. \*\* P < 0.005. Data are representative of 2 independent experiments.
