# Supplementary material for: Posttranscriptional Regulation of the Yersinia pestis Cyclic AMP Receptor Protein Crp and Impact on Virulence
Source: PubMed Central journal article supplement — mBio. 2014 Feb 11;5(1):e01038-13. doi: 10.1128/mBio.01038-13 (PMC3950509; doi:10.1128/mbio.01038-13), 2014-02-11
Supplement: mbo001141735sf04.pdf [file mbo001141735sf04.pdf]

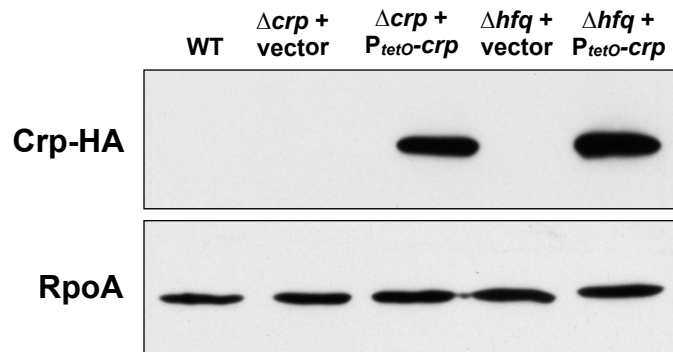

**FIG S4** Crp-HA production in pCD1<sup>+</sup> strains of *Y. pestis*. Wild-type pCD1<sup>+</sup> *Y. pestis*, the  $\Delta hfq$  and  $\Delta crp$  strains of *Y. pestis* carrying the constitutively expressed  $P_{tetO-crp}$ -HA construct, or the equivalent mutants carrying the chromosomal-integrated Tn7 vector only were cultured for 6 h at 37°C in the presence of 2.5 mM  $CaCl_2$  and cell lysates were analyzed by immunoblot for the HA-tag (top panel) or RpoA (as a loading control, bottom panel).
