# Supplementary material for: Posttranscriptional Regulation of the Yersinia pestis Cyclic AMP Receptor Protein Crp and Impact on Virulence
Source: PubMed Central journal article supplement — mBio. 2014 Feb 11;5(1):e01038-13. doi: 10.1128/mBio.01038-13 (PMC3950509; doi:10.1128/mbio.01038-13), 2014-02-11
Supplement: mbo001141735sf05.pdf [file mbo001141735sf05.pdf]

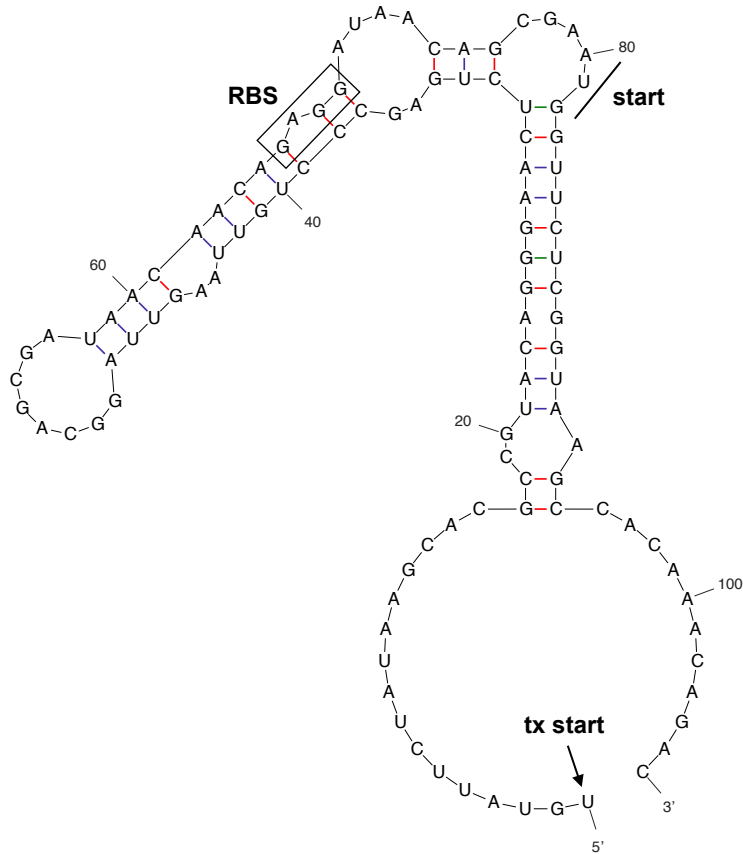

**FIG S5** Predicted mFOLD secondary structure of the *Y. pestis crp* 5' UTR and proximal coding region. The most probable prediction with the lowest free energy state is shown. The transcriptional start site is indicated with an arrow, the putative ribosome binding site (RBS) is highlighted with a box, and the translational start site is shown with a black line.
