# Supplementary material for: Posttranscriptional Regulation of the Yersinia pestis Cyclic AMP Receptor Protein Crp and Impact on Virulence
Source: PubMed Central journal article supplement — mBio. 2014 Feb 11;5(1):e01038-13. doi: 10.1128/mBio.01038-13 (PMC3950509; doi:10.1128/mbio.01038-13), 2014-02-11
Supplement: mbo001141735st1.pdf [file mbo001141735st1.pdf]

**Table S1**  $\Delta C_t$  values of the *gyrB* transcript normalized to *proS* or 16S rRNA during pneumonic plague.

|             | 24 h* | 36 h  | 48 h  | 72 h  |
|-------------|-------|-------|-------|-------|
| <i>proS</i> | 3.32  | 3.05  | 2.35  | 2.99  |
| 16S rRNA    | 15.20 | 16.37 | 16.49 | 16.61 |

\* time post-infection
