# Supplementary material for: Posttranscriptional Regulation of the Yersinia pestis Cyclic AMP Receptor Protein Crp and Impact on Virulence
Source: PubMed Central journal article supplement — mBio. 2014 Feb 11;5(1):e01038-13. doi: 10.1128/mBio.01038-13 (PMC3950509; doi:10.1128/mbio.01038-13), 2014-02-11
Supplement: mbo001141735st2.pdf [file mbo001141735st2.pdf]

**TABLE S2** Bacterial strains used in this study.

| Bacterial strain                                                         | Designation | Genotype and/or characteristics                                                              | Source     |
|--------------------------------------------------------------------------|-------------|----------------------------------------------------------------------------------------------|------------|
| <b><i>Y. pestis</i></b>                                                  |             |                                                                                              |            |
| CO92 LCR-                                                                | PAN259      | wild-type, pCD1-, pMT1+, pPCP1+, pgm+                                                        | Lab stock  |
| CO92 LCR- $\Delta hfq$                                                   | PAN610      | $\Delta hfq$                                                                                 | (46)       |
| CO92 LCR- $\Delta hfq+hfq$                                               | PAN141      | $\Delta hfq$ complemented with <i>hfq</i> in the <i>attTn7</i> site                          | (46)       |
| CO92 LCR- <i>gfp</i>                                                     | PAN494      | <i>attTn7</i> promoterless <i>gfp</i> for background fluorescence subtraction                | (46)       |
| CO92 LCR- $\Delta hfq$ <i>gfp</i>                                        | PAN495      | $\Delta hfq$ ; <i>attTn7</i> promoterless <i>gfp</i> for background fluorescence subtraction | (46)       |
| CO92 LCR- $\Delta crp$                                                   | PAN31       | $\Delta crp$                                                                                 | This study |
| CO92 LCR- $\Delta pla$                                                   | PAN314      | $\Delta pla$                                                                                 | (6)        |
| CO92 LCR- $\Delta hfq$ P <sub>tetO</sub> - <i>crp</i> -HA                | PAN605      | $\Delta hfq$ ; <i>attTn7</i> ATc-inducible <i>crp</i> -HA                                    | This study |
| CO92 LCR- $\Delta crp$ P <sub>tetO</sub> - <i>crp</i> -HA                | PAN606      | $\Delta crp$ ; <i>attTn7</i> ATc-inducible <i>crp</i> -HA                                    | This study |
| CO92 LCR- P <sub>tetO</sub> - <i>crp</i> -HA                             | PAN604      | <i>attTn7</i> ATc-inducible <i>crp</i> -HA                                                   | This study |
| CO92 LCR- P <sub>pla</sub> - <i>gfp</i>                                  | PAN607      | <i>attTn7</i> <i>pla</i> transcriptional + post-transcriptional reporter                     | This study |
| CO92 LCR- $\Delta hfq$ P <sub>pla</sub> - <i>gfp</i>                     | PAN608      | $\Delta hfq$ ; <i>attTn7</i> <i>pla</i> transcriptional + post-transcriptional reporter      | This study |
| CO92 LCR- P <sub>tetO</sub> - <i>pla</i> 5' UTR- <i>gfp</i>              | PAN619      | <i>attTn7</i> <i>pla</i> post-transcriptional reporter                                       | This study |
| CO92 LCR- $\Delta hfq$ P <sub>tetO</sub> - <i>pla</i> 5' UTR- <i>gfp</i> | PAN620      | $\Delta hfq$ ; <i>attTn7</i> <i>pla</i> post-transcriptional reporter                        | This study |
| CO92 LCR- <i>crp</i> -HA                                                 | PAN364      | chromosomal <i>crp</i> -HA at native locus                                                   | This study |
| CO92 LCR- $\Delta hfq+hfq$ <i>crp</i> -HA                                | PAN365      | $\Delta hfq+hfq$ ; chromosomal <i>crp</i> -HA at native locus                                | This study |
| CO92 LCR- $\Delta hfq$ <i>crp</i> -HA                                    | PAN366      | $\Delta hfq$ ; chromosomal <i>crp</i> -HA at native locus                                    | This study |
| CO92 LCR- P <sub>crp</sub> - <i>gfp</i>                                  | PAN578      | <i>attTn7</i> <i>crp</i> transcriptional + post-transcriptional reporter                     | This study |
| CO92 LCR- $\Delta hfq$ P <sub>crp</sub> - <i>gfp</i>                     | PAN579      | $\Delta hfq$ ; <i>attTn7</i> <i>crp</i> transcriptional + post-transcriptional reporter      | This study |
| CO92 LCR- P <sub>tetO</sub> - <i>crp</i> 5' UTR- <i>gfp</i>              | PAN576      | <i>attTn7</i> <i>crp</i> post-transcriptional reporter                                       | This study |
| CO92 LCR- $\Delta hfq$ P <sub>tetO</sub> - <i>crp</i> 5' UTR- <i>gfp</i> | PAN577      | $\Delta hfq$ ; <i>attTn7</i> <i>crp</i> post-transcriptional reporter                        | This study |
| CO92                                                                     | SAN2        | wild-type, pCD1+, pMT1+, pPCP1+, pgm+                                                        | Lab stock  |
| CO92 $\Delta hfq$                                                        | SAN11       | $\Delta hfq$                                                                                 | This study |
| CO92 $\Delta crp$                                                        | SAN137      | $\Delta crp$                                                                                 | This study |
| CO92 $\Delta hfq$ + Tn7 vector                                           | SAN157      | $\Delta hfq$ ; <i>attTn7</i> vector control                                                  | This study |
| CO92 $\Delta crp$ + Tn7 vector                                           | SAN155      | $\Delta crp$ ; <i>attTn7</i> vector control                                                  | This study |
| CO92 $\Delta hfq$ P <sub>tetO</sub> - <i>crp</i> -HA                     | SAN169      | $\Delta hfq$ ; <i>attTn7</i> constitutively expressed <i>crp</i> -HA (no <i>tetR</i> )       | This study |
| CO92 $\Delta crp$ P <sub>tetO</sub> - <i>crp</i> -HA                     | SAN167      | $\Delta crp$ ; <i>attTn7</i> constitutively expressed <i>crp</i> -HA (no <i>tetR</i> )       | This study |
| <b><i>E. coli</i></b>                                                    |             |                                                                                              |            |
| DH5a                                                                     | LAN95       |                                                                                              | Lab stock  |
| S17lambda pir                                                            | LAN20       |                                                                                              | Lab stock  |
