# Supplementary material for: Posttranscriptional Regulation of the Yersinia pestis Cyclic AMP Receptor Protein Crp and Impact on Virulence
Source: PubMed Central journal article supplement — mBio. 2014 Feb 11;5(1):e01038-13. doi: 10.1128/mBio.01038-13 (PMC3950509; doi:10.1128/mbio.01038-13), 2014-02-11
Supplement: mbo001141735st3.pdf [file mbo001141735st3.pdf]

**TABLE S3** Plasmids used in this study.

| Plasmid                | Marker                              | Characteristics                                                                                                                                      | Source or reference |
|------------------------|-------------------------------------|------------------------------------------------------------------------------------------------------------------------------------------------------|---------------------|
| pLB38                  | amp <sup>R</sup> ; kan <sup>R</sup> | P <sub>plā</sub> -gfp reporter cloned into the BamHI-PstI sites of pUC18R6K-mini-Tn7T-kan                                                            | This study          |
| pLB41                  | amp <sup>R</sup> ; kan <sup>R</sup> | P <sub>tetO</sub> - <i>pla</i> 5' UTR-gfp reporter, lacking the P <sub>tetO</sub> 5' UTR, cloned into the BamHI-PstI sites of pUC18R6K-mini-Tn7T-kan | This study          |
| pLB35                  | amp <sup>R</sup> ; kan <sup>R</sup> | P <sub>crp</sub> -gfp reporter cloned into the BamHI-PstI sites of pUC18R6K-mini-Tn7T-kan                                                            | This study          |
| pLB39                  | amp <sup>R</sup>                    | P <sub>tetO</sub> - <i>crp</i> 5' UTR-gfp reporter, lacking the P <sub>tetO</sub> 5' UTR, cloned into the BamHI-PstI sites of pUC18R6K-mini-Tn7T-kan | This study          |
| pLB18                  | kan <sup>R</sup>                    | 500 bp upstream + 500 bp downstream of <i>crp</i> fused to HA, cloned into SpeI site of pSR47S                                                       | This study          |
| pLB40                  | amp <sup>R</sup> ; kan <sup>R</sup> | P <sub>tetO</sub> - <i>crp</i> -HA construct cloned into the BamHI-PstI sites of pWL212                                                              | This study          |
| pWL335                 | amp <sup>R</sup> ; kan <sup>R</sup> | P <sub>tetO</sub> - <i>crp</i> -HA construct cloned into the BamHI-PstI sites of pUC18R6K-mini-Tn7T-kan                                              | This study          |
| pWL204                 | amp <sup>R</sup>                    | Plasmid containing lambda red recombination genes; counter-selection with <i>sacB</i>                                                                | (6)                 |
| pWL213                 | amp <sup>R</sup> ; kan <sup>R</sup> | Plasmid containing P <sub>tetO</sub> sequence                                                                                                        | (6)                 |
| pUC18R6K-mini-Tn7T-kan | amp <sup>R</sup> ; kan <sup>R</sup> | Vector for Tn7-based chromosomal integration                                                                                                         | (64)                |
| pWL212                 | amp <sup>R</sup> ; kan <sup>R</sup> | Vector for Tn7-based chromosomal integration; carries constitutively expressed <i>tetR</i>                                                           | (6)                 |
| pTnMod-RKm             | kan <sup>R</sup>                    | Plasmid carrying the Tn5-based minitransposon                                                                                                        | (45)                |
