# Supplementary material for: Posttranscriptional Regulation of the Yersinia pestis Cyclic AMP Receptor Protein Crp and Impact on Virulence
Source: PubMed Central journal article supplement — mBio. 2014 Feb 11;5(1):e01038-13. doi: 10.1128/mBio.01038-13 (PMC3950509; doi:10.1128/mbio.01038-13), 2014-02-11
Supplement: mbo001141735st4.pdf [file mbo001141735st4.pdf]

**TABLE S4** Primers used in this study.

| <b>Primers for cloning/mutagenesis</b>       | <b>Sequence (5' --&gt; 3')</b>                                                                 |
|----------------------------------------------|------------------------------------------------------------------------------------------------|
| <i>pla</i> 5' -500 PstI                      | CTGCAGCGCCTGCTGGCTGCACTTGTCTGGTTGCCGG                                                          |
| <i>pla</i> ( <i>gfp</i> ) 3' +27             | GTGAAAAGTTCTTCTCCTTTACTCATGGTTGCCACAATAGAACTTTTCTTCAT                                          |
| <i>gfp</i> ( <i>pla</i> ) 5' 1               | ATGAAGAAAAGTTCTATTGTGGCAACCATGAGTAAAGGAGAAGAAGTTTTCAC                                          |
| <i>gfp</i> 3'717 Bam                         | CGGGATCCTTATTTGTATAGTTCATCCATGCCATGTG                                                          |
| P <sub>tet</sub> -405 5' Pst                 | AACTGCAGCTTTCACCAGCGTTTCTGGGGT                                                                 |
| P <sub>tet</sub> ( <i>pla</i> 5' UTR) 3' -tx | CTCTCTGCATGAACGAAAACATATTATTTGTATCTGATTATCTAATTTTCATTTTTAATAATGTGTGCTCAGTATCTCTATCACTGATA      |
| <i>gfp</i> ( <i>pla</i> 5' UTR) 5' 1         | CAAATAATATGTTTTCGTTCATGCAGAGAGATTAAGGGTGTCTAATGAAGAAAAGTTCTATTGTGGCAACCATGAGTAAAGGAGAA<br>GAAC |
| <i>gfp</i> - <i>crp</i> 5'                   | ATGGTTCTCGGTAAGCCACAAACAGACATGAGTAAAGGAGAAGAAGTTTTCAC                                          |
| <i>crp</i> 5' UTR- <i>gfp</i> 3'             | GTGAAAAGTTCTTCTCCTTTACTCATGTCTGTTTGTGGCTTACCGAGAACCAT                                          |
| P <sub>tet</sub> - <i>crp</i> (-tx) 3'       | CCCTGTACGGCGTGCTTATAGAATACAGTGCTCAGTATCTCTATCACTGATA                                           |
| <i>crp</i> 5' -496 PstI                      | CTGCAGGACACGACATCAATGGCGCTACACCCCCCGC                                                          |
| <i>crp</i> 5' 128 SpeI                       | GACTAGTCGTGAAAGGCTCCGTTGCGGTGCTG                                                               |
| <i>crp</i> 3' 630 HA                         | AGCGTAATCTGGAACATCGTATGGGTAAGCGTAATCTGGAACATCGTATGGGTAACGGGTGCCGTAACGACGATCGT                  |
| <i>crp</i> 5' 631 HA                         | TACCACATACGATGTTCCAGATTACGCTTACCACATACGATGTTCCAGATTACGCTTAATTCCCTCTAAAACCGGCGTTAAAGC           |
| <i>crp</i> 3' +502 SpeI                      | GACTAGTCGCCATACCAAAGCGTCCCCACGGC                                                               |
| <i>crp</i> 5' 1 (P <sub>tet</sub> )          | CGAATTCATTAAGAGGAGAAAGGTACCCATGGTTCTCGGTAAGCCACAAACAGAC                                        |
| <i>crp</i> -HA 3' 633 BamHI                  | GGATCCTTAAGCGTAATCTGGAACATCGTATGGGTA                                                           |
| P <sub>tet</sub> 3' 1 ( <i>crp</i> )         | GTCTGTTTGTGGCTTACCGAGAACCATGGGTACCTTTCTCCTCTTTAATGAATTCCG                                      |
| <i>crp</i> 3' +500                           | AGAGCAAGGGTGCCTGCCAGATAG                                                                       |
| P4 <i>crp</i> 5' 632                         | GGTCGACGGATCCCCGGAATAATTCCCTCTAAAACCGGCGTTAAAGCTG                                              |
| <i>crp</i> 5' -500                           | AATAGACACGACATCAATGGCGCTAC                                                                     |
| P1 <i>crp</i> 3'3                            | GAAGCAGCTCCAGCCTACACCATTGCTGTTATCCTCTGTTGTTATCGCTG                                             |
|                                              |                                                                                                |
| <b>Primers for qRT-PCR</b>                   | <b>Sequence (5' --&gt; 3')</b>                                                                 |
| <i>pla</i> 5' 397                            | GACCTCAATGTGAAAGGCTGGTTACACC                                                                   |
| <i>pla</i> 3' 498                            | ACCACCTGTAGCTGTCCAACCTGAAAC                                                                    |
| <i>crp</i> 5' 2                              | TGGTTCTCGGTAAGCCACAAACAGAC                                                                     |
| <i>crp</i> 3' 146                            | GCAACGGAGCCTTTCACGATGTAG                                                                       |
| <i>gyrB</i> .r.3'                            | ATTGGTAAAGGTCTGGAAACTTGGCC                                                                     |
| <i>gyrB</i> .f.5'                            | TCGCCGTGAAGGTAAAGTTC                                                                           |
| <i>proS</i> 5' 745                           | ACAGAAGAGCTGCGAATCGTTGACAC                                                                     |
| <i>proS</i> 3' 887                           | AGCGCAACCAACTTATGACCACTCTC                                                                     |
| 16S rRNA 5' 993                              | TAAAGTGCCTTCGGGAACTGTGAG                                                                       |
| 16S rRNA 3' 1109                             | ACGTGCTGGCAACAAAGGATAAGG                                                                       |
|                                              |                                                                                                |
| <b>Primers for RACE</b>                      | <b>Sequence (5' --&gt; 3')</b>                                                                 |
| <i>crp</i> 5' 464                            | CTTCCTCATCTTTGATCAGCAC                                                                         |
| <i>crp</i> 3' 444                            | GCAAAGAGATGATCCTCTCC                                                                           |
